# Supplementary material for: CDX2 as a Predictive Biomarker Involved in Immunotherapy Response Suppresses Metastasis through EMT in Colorectal Cancer
Source: Hindawi journal article supplement (doi:10.1155/2022/9025668), 2022-10-12

A

Tumor size

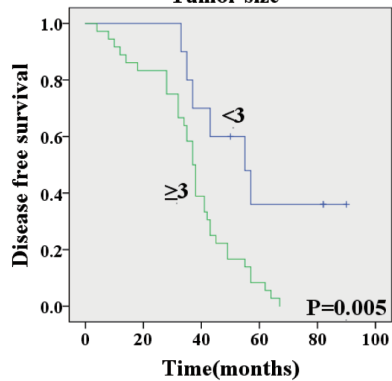

B

Differentiation

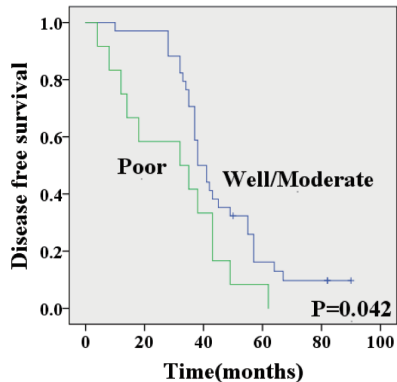

C

Depth grading of tumor invasion

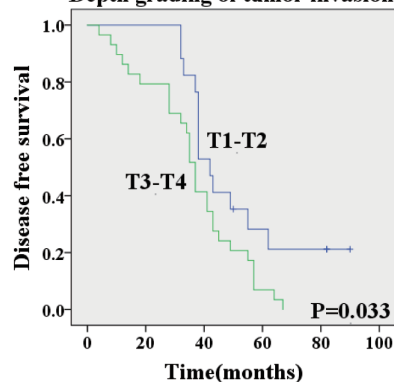

D

TNM stage

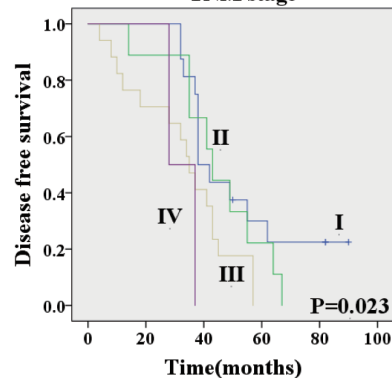

E

Lymph node status

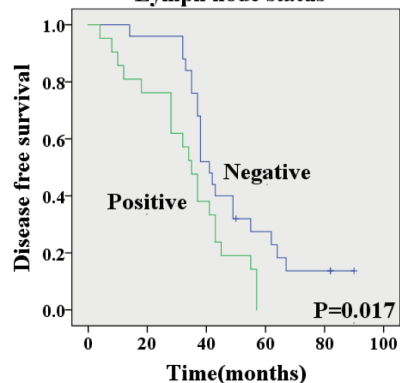

F

M stage

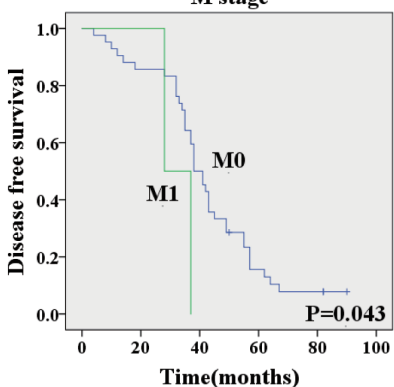

Supplement: f1 [file 9025668.f1.pdf]
