# Supplementary material for: CDX2 as a Predictive Biomarker Involved in Immunotherapy Response Suppresses Metastasis through EMT in Colorectal Cancer
Source: Hindawi journal article supplement (doi:10.1155/2022/9025668), 2022-10-12

A

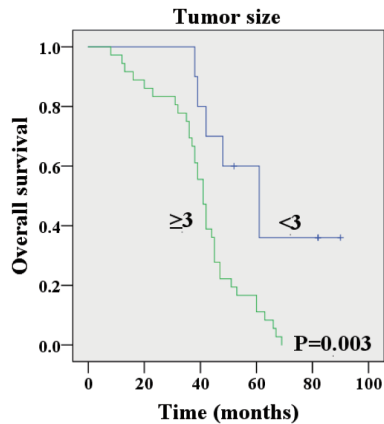

B

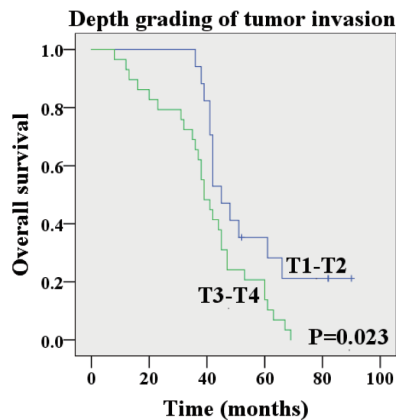

C

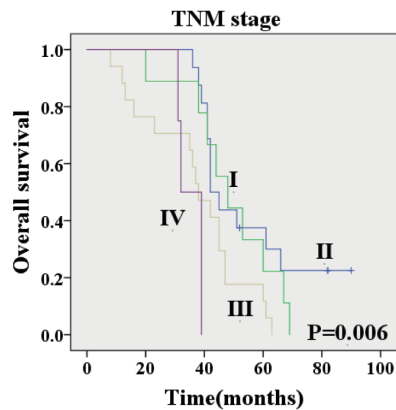

D

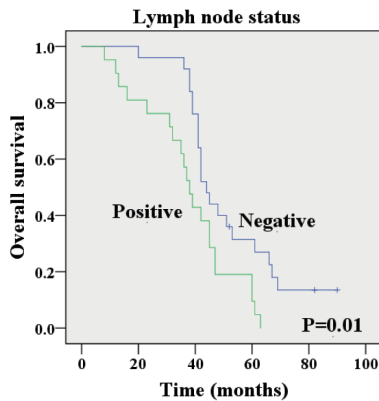

E

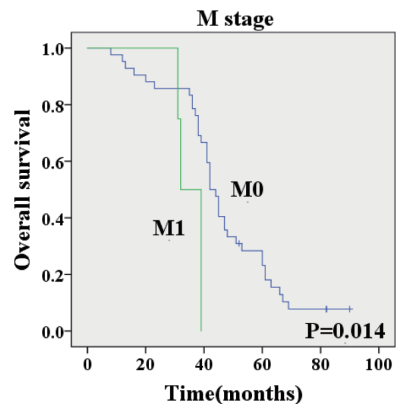

Supplement: f2 [file 9025668.f2.pdf]
